# Supplementary material for: A dynamic fate map of the forebrain shows how vertebrate eyes form and explains two causes of cyclopia
Source: Oxford University Press journal article supplement (doi:10.1242/dev.02678), 2006-11-01
Supplement: dev02678tables1.pdf [file dev02678tables1.pdf]

**Table S1. Locations of subducting tissues versus the anterior eye field in wild-type, *cyc* MO and *silberblick* embryos**

| Location                                                          | Relative angle (degrees)       |                                |                                |
|-------------------------------------------------------------------|--------------------------------|--------------------------------|--------------------------------|
|                                                                   | Wild-type                      | <i>cyc</i> MO                  | <i>silberblick</i>             |
| Medial anterior eye field versus initiation of keel formation*    | 30.29 ( <i>n</i> =1)           | 5.56 ( <i>n</i> =1)            | 19.52 ( <i>n</i> =1)           |
| Medial anterior eye field versus posterior eye field <sup>§</sup> | 35.64±5.94 s.d. ( <i>n</i> =3) | 50.64±3.05 s.d. ( <i>n</i> =3) | 34.17±4.58 s.d. ( <i>n</i> =6) |

Cell fates were identified by live movie tracing (\*) or by in situ analysis (<sup>§</sup>) (Fig. S1). Their locations, with respect to the medial anterior boundary of the eye field, were compared at 80% epiboly (8.4 hpf) by measuring the intervening angle subtended at the embryonic centroid. s.d., standard deviation.
